# Supplementary material for: Diagnosis and management of postpartum haemorrhage
Source: HighWire-hosted journal article supplement (doi:10.1136/bmj.j3875), 2017-09-27
Supplement: chae036081.wi.pdf [file chae036081.wi.pdf]

# Postpartum haemorrhage

A suggested approach to management based on possible causes\*

## Primary postpartum haemorrhage ⌚ Within the first 24 hours of delivery

### Poor uterine tone

**Clinical findings**

- Abdominal palpation**  
Uterus feels relaxed, boggy, and soft
- Uterine fundus**  
May be felt above the umbilicus if uterine cavity is filled with blood and clots

**Investigations**

- Full blood count
- Coagulation profile
- Urea and electrolytes
- If patient is not responsive to fluid and blood replacement:  
**Abdominal ultrasound**  
To exclude uterine rupture or intra-peritoneal bleeding

**Management**

- Uterotonic agents**
  - Oxytocics
  - Prostaglandins
  - Ergot alkaloids
- Uterine balloon tamponade**
- HAEMOSTASIS algorithm**  
See main article for recommended, stepwise, surgical measures when medical treatment fails

### Tears or trauma

**Clinical findings**

- Bleeding**  
from areas of trauma within genital tract
- Uterine rupture**
- Extension of uterine angles**
- Tears during caesarean section**
- Extragenital causes**  
Such as subcapsular liver rupture or rupture of ovarian or splenic vessels

**Investigations**

- Inspection during caesarean section**  
By exteriorisation
- Ultrasound**  
May help identify free fluid in patients with uterine rupture

**Management**

- Repair of identified genital tract trauma**
- Pelvic arterial embolisation**  
May be required in cases of broad ligament or supravator haematoma

### Retained tissue

**Clinical findings**

- Retained placenta and membranes**  
Identified during bimanual examination

**Investigations**

- Examination under anaesthesia**

**Management**

- Manual removal**  
of placenta or retained products of conception under regional or general anaesthetic

### Coagulopathy

**Clinical findings**

- Continuing bleeding, contracted uterus**

**Investigations**

- Urea and electrolytes
- Full blood count
- Coagulation profile

**Management**

- Medical**  
Immediate replacement of blood and coagulation factors and platelets
- Surgical**  
Only with trauma or atonic haemorrhage unresponsive to medical treatment

## Secondary postpartum haemorrhage ⌚ 24 hours to 12 weeks after delivery

### Endometritis

**Clinical findings**

- Uterine tenderness**  
on clinical examination
- Guarding and rebound tenderness**  
May be noted if there is peritonitis

**Investigations**

- Ultrasound to exclude:**  
Retained products of conception  
Pelvic abscess
- High vaginal swabs**

**Management**

- Oral antibiotics**
- Admit to hospital**  
for intravenous antibiotics if patient is unwell or haemodynamically unstable

### Pseudo-aneurysm, uterine artery

**Clinical findings**

- Profuse bleeding**
- Shock**
- More than 24 hours after childbirth

**Investigations**

- Doppler ultrasound**
- MRI**
- Pelvic angiography**

**Management**

- Medical**  
Antibiotics if coexisting infection  
Correction of blood volume
- Surgical**  
Uterine artery embolisation

### Retained tissue

**Clinical findings**

- Fever**
- Foul smelling or offensive vaginal discharge**
- Uterine tenderness**

**Investigations**

- Ultrasound**  
To confirm retained products of conception  
To exclude pelvic abscess

**Management**

- Medical**  
Oral antibiotics  
Admit for intravenous antibiotics if unwell or haemodynamically unstable
- Surgical**  
Evacuation of retained products of conception  
Consider expectant management in mild cases

\*Adapted from RCOG Green-top Guideline on postpartum haemorrhage<sup>5</sup>
